# Supplementary material for: Mitochondrial genome comparison reveals the evolution of cnidarians
Source: PubMed Central journal article supplement (PMC10261974; doi:10.1002/ece3.10157), 2023-06-13

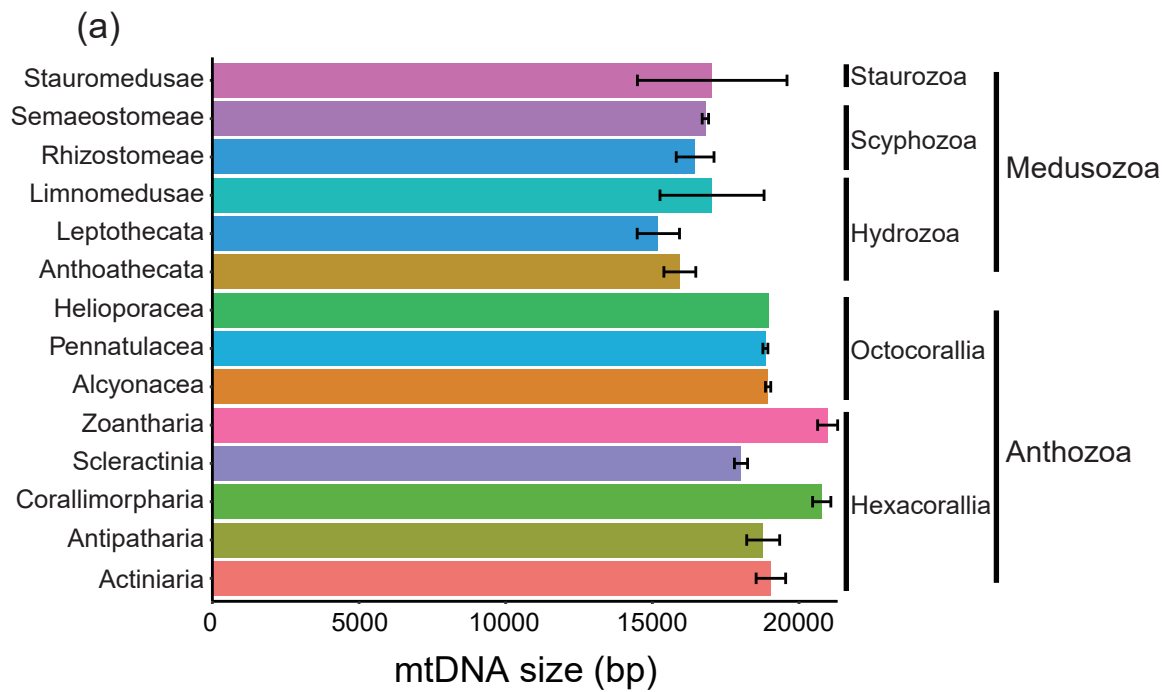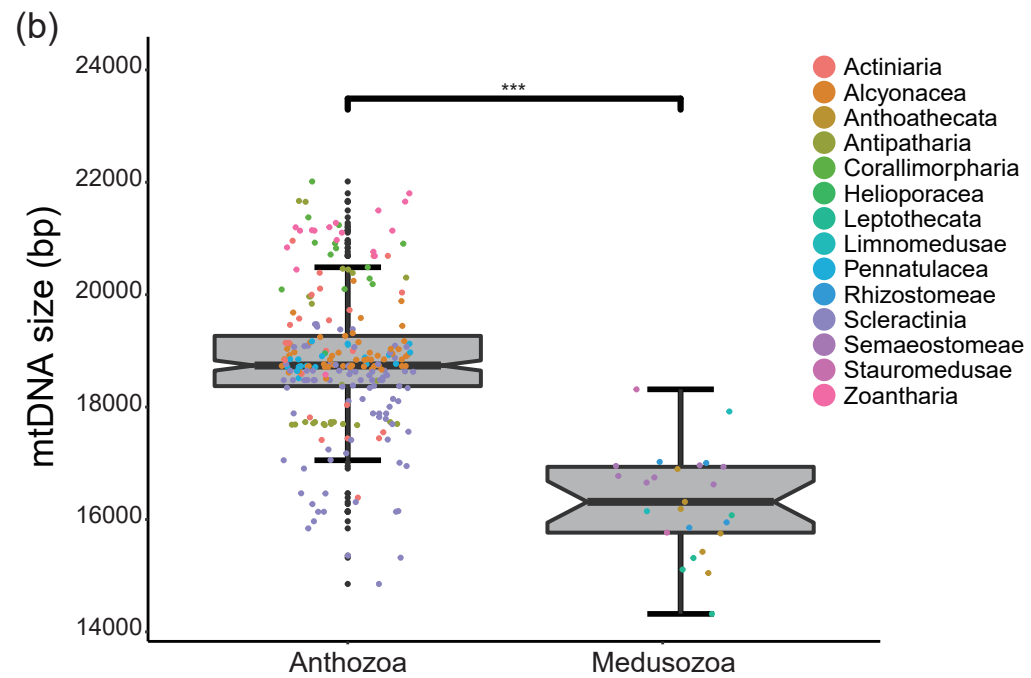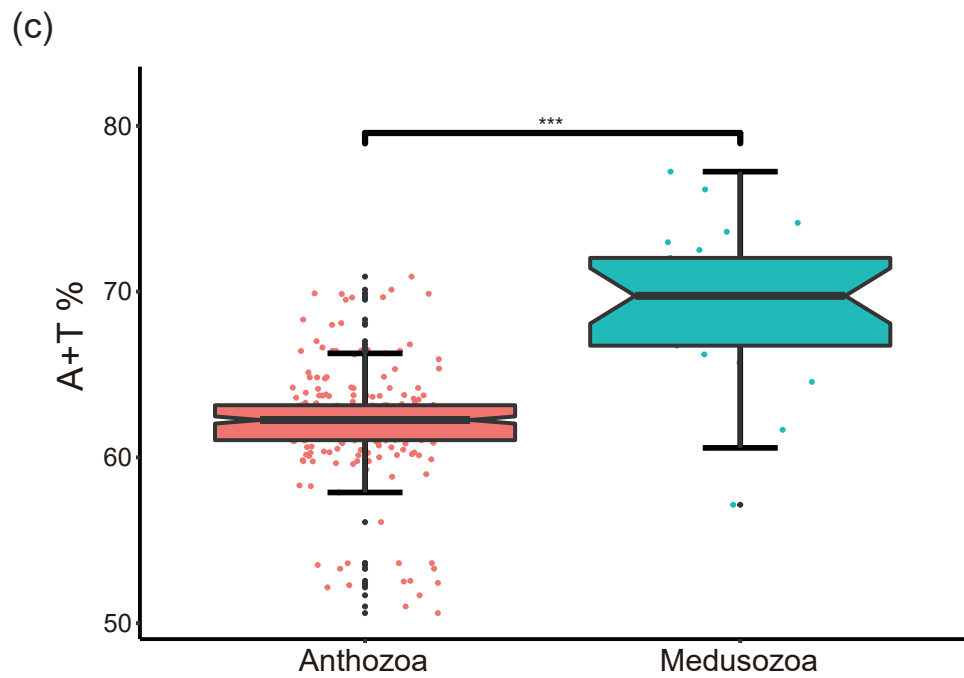

Supplement: ECE3-13-e10157-s003.pdf [file ECE3-13-e10157-s003.pdf]
